# Supplementary material for: The Effect of WS2 Nanosheets on the Non-Isothermal Cold- and Melt-Crystallization Kinetics of Poly(l-lactic acid) Nanocomposites
Source: MDPI journal article supplement (doi:10.3390/polym13132214), 2021-07-05
Supplement: s1 [file s1]

## Supporting Information

### The Effect of WS<sub>2</sub> Nanosheets on the Non-Isothermal Cold- and Melt-Crystallization Kinetics of Poly(L-lactic acid) Nanocomposites

Mohammed Naffakh<sup>1</sup>, Pablo Rica<sup>1</sup>, Carmen Moya-Lopez<sup>2,3</sup>, José Antonio Castro-Osma<sup>2,4</sup>, Carlos Alonso-Moreno<sup>2,4</sup>, Diego A. Moreno<sup>1,2</sup>

<sup>1</sup>Escuela Técnica Superior de Ingenieros Industriales, Universidad Politécnica de Madrid (ETSII-UPM), José Gutiérrez Abascal 2, 28006 Madrid, Spain pablo.rica.mozo@alumnos.upm.es (P.R.); diego.moreno@upm.es (D.A.M.)

<sup>2</sup>Facultad de Farmacia, Universidad de Castilla-La Mancha (FF-UCLM), Avda. Dr. José María Sánchez Ibáñez s/n, E-02071 Albacete, Spain

carmen.moya-lopez-pelaez@univ-lorraine.fr (C.M.P); JoseAntonio.castro@uclm.es (J.A.C-O.); carlos.amoreno@uclm.es (C.A.M.)

<sup>3</sup>LMOPS, CentraleSupélec, University of Lorraine, 2 rue E. Belin, 57070 Metz, France.

<sup>4</sup>Centro Regional de Investigaciones Biomédicas. Unidad NanoCRIB, Albacete 02008, Spain.

\* Correspondence: mohammed.naffakh@upm.es

#### 1. Synthesis of [AlEt<sub>2</sub>{ $\kappa^2$ -bpzbe}] (1)

In 250 cm<sup>3</sup> Schlenk tube, bpzbeH (1.0 g, 3.4 mmol) was dissolved in dry toluene (70 mL) and heated to 50 °C. A solution of AlEt<sub>3</sub> (1 M in hexane, 3.4 mL, 3.4 mmol) was added and the reaction mixture was stirred at this temperature for 2 h. Removal of the volatiles under reduced pressure yielded **1** as a white solid. The product was washed with n-hexane (25 mL) and recrystallized from toluene at -26 °C to give compound **1** as a white solid.

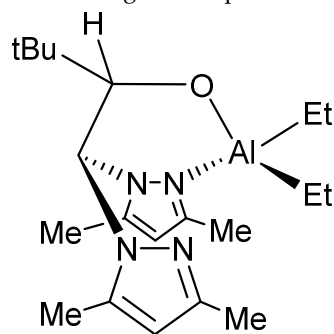

**Initiator 1**

Figure S1. Initiator used for the synthesis of PLLA.

#### 2. Poly(L-lactic acid) Characterization

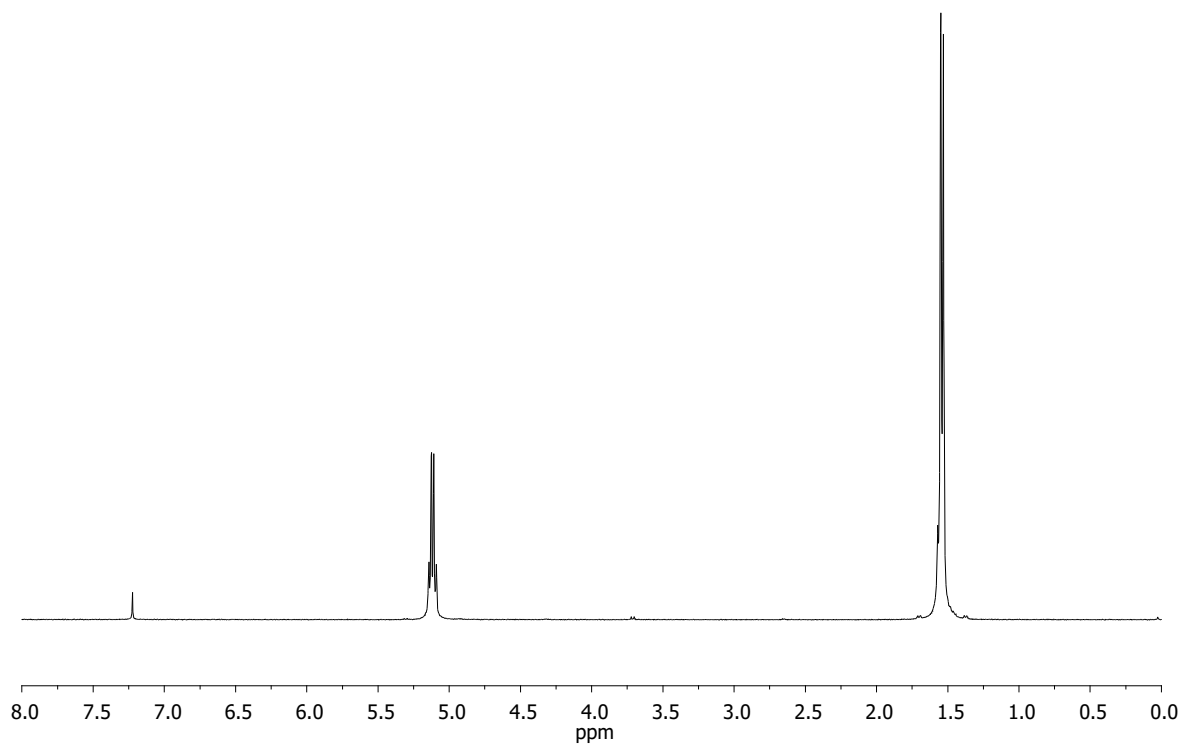

**Figure S2.** Representative  $^1\text{H}$  NMR spectrum of PLLA obtained by **1**.

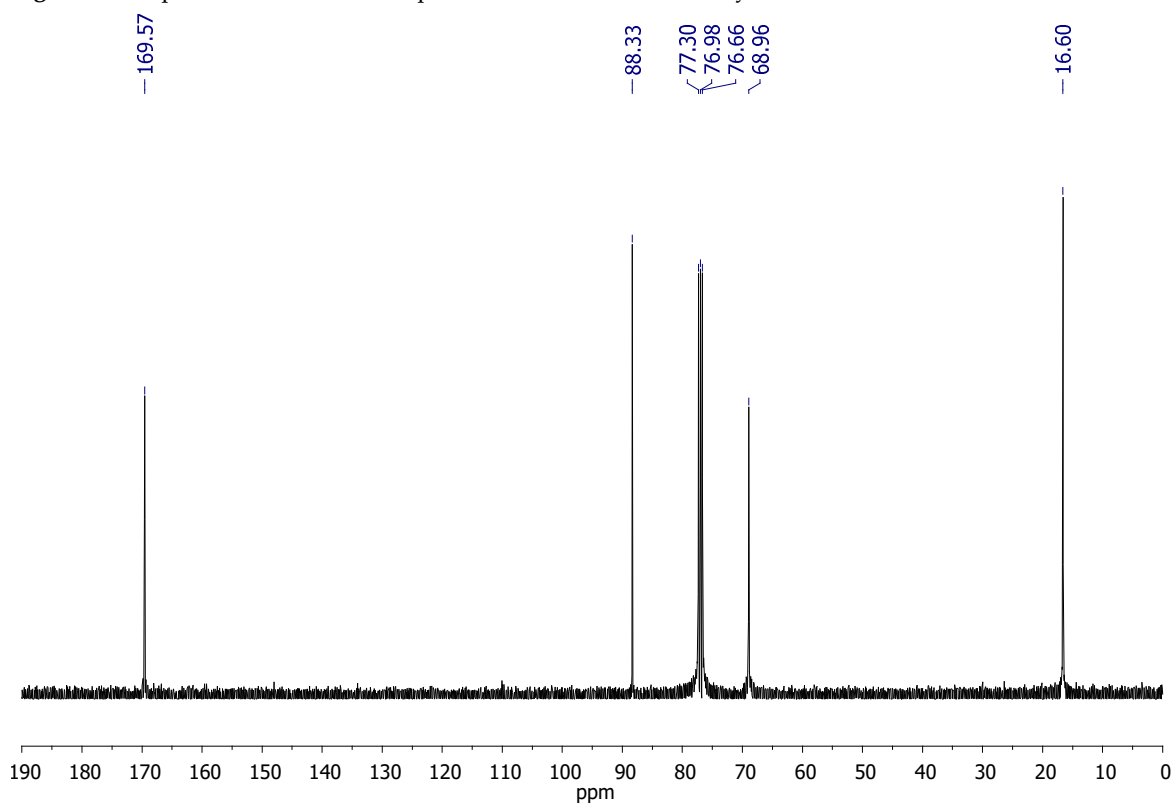

**Figure S3.** Representative  $^{13}\text{C}\{^1\text{H}\}$ -NMR spectrum of PLLA obtained by **1**.

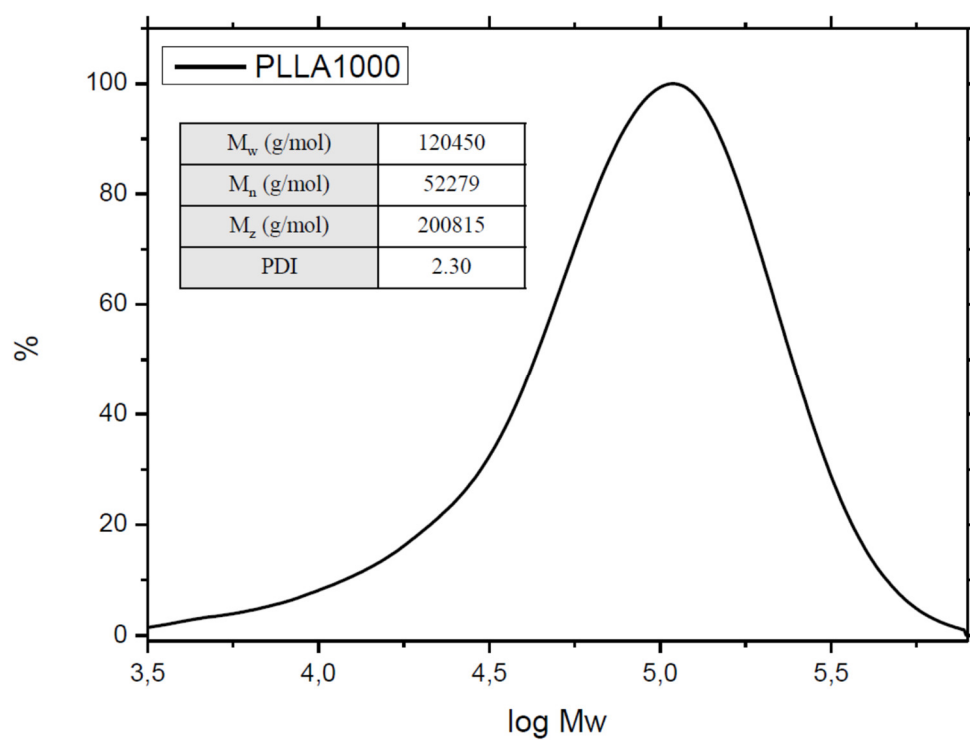

**Figure S4.** Representative GPC profile of PLLA prepared by 1.
